# Supplementary material for: Mechanisms and Implications of Bacterial Invasion across the Human Skin Barrier
Source: PubMed Central journal article supplement (PMC9241919; doi:10.1128/spectrum.02744-21), 2022-05-09
Supplement: spectrum.02744-21-s001.pdf [file spectrum.02744-21-s001.pdf]

**Bacterial invasion across the human skin barrier – mechanisms and ensuing tissue degradation.**

Supplemental Material

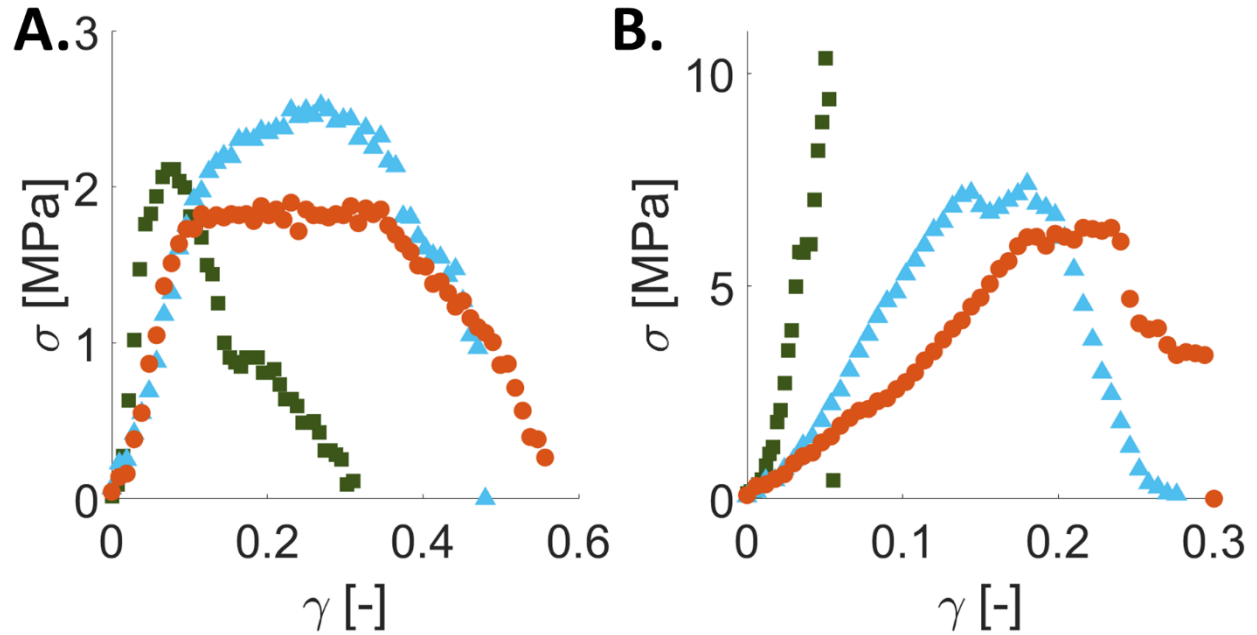

**Supplemental Figure 1. *S. aureus* reduces SC plastic deformation at 100% RH.**

Representative stress-strain plots of stratum corneum samples subjected to: no media immersion (orange circles), media immersion (blue triangles), and the addition of bacteria (green squares) for (A) control and (B) delipid conditions.

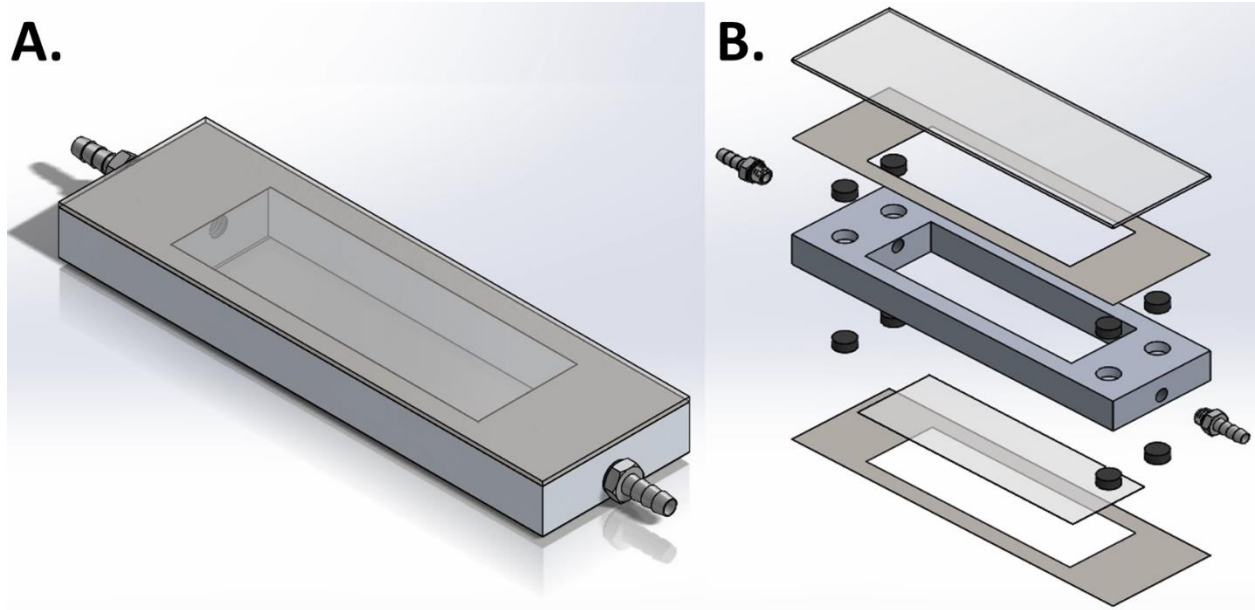

**Supplemental Figure 2. Drip chamber schematic.** (A) Overview of drip chamber setup (B) Exploded view of drip chamber major components. **This device provides a physiologically relevant arrangement that more closely mimics skin temperature and diurnal hydration/dehydration cycles to study bacteria-skin interactions.**

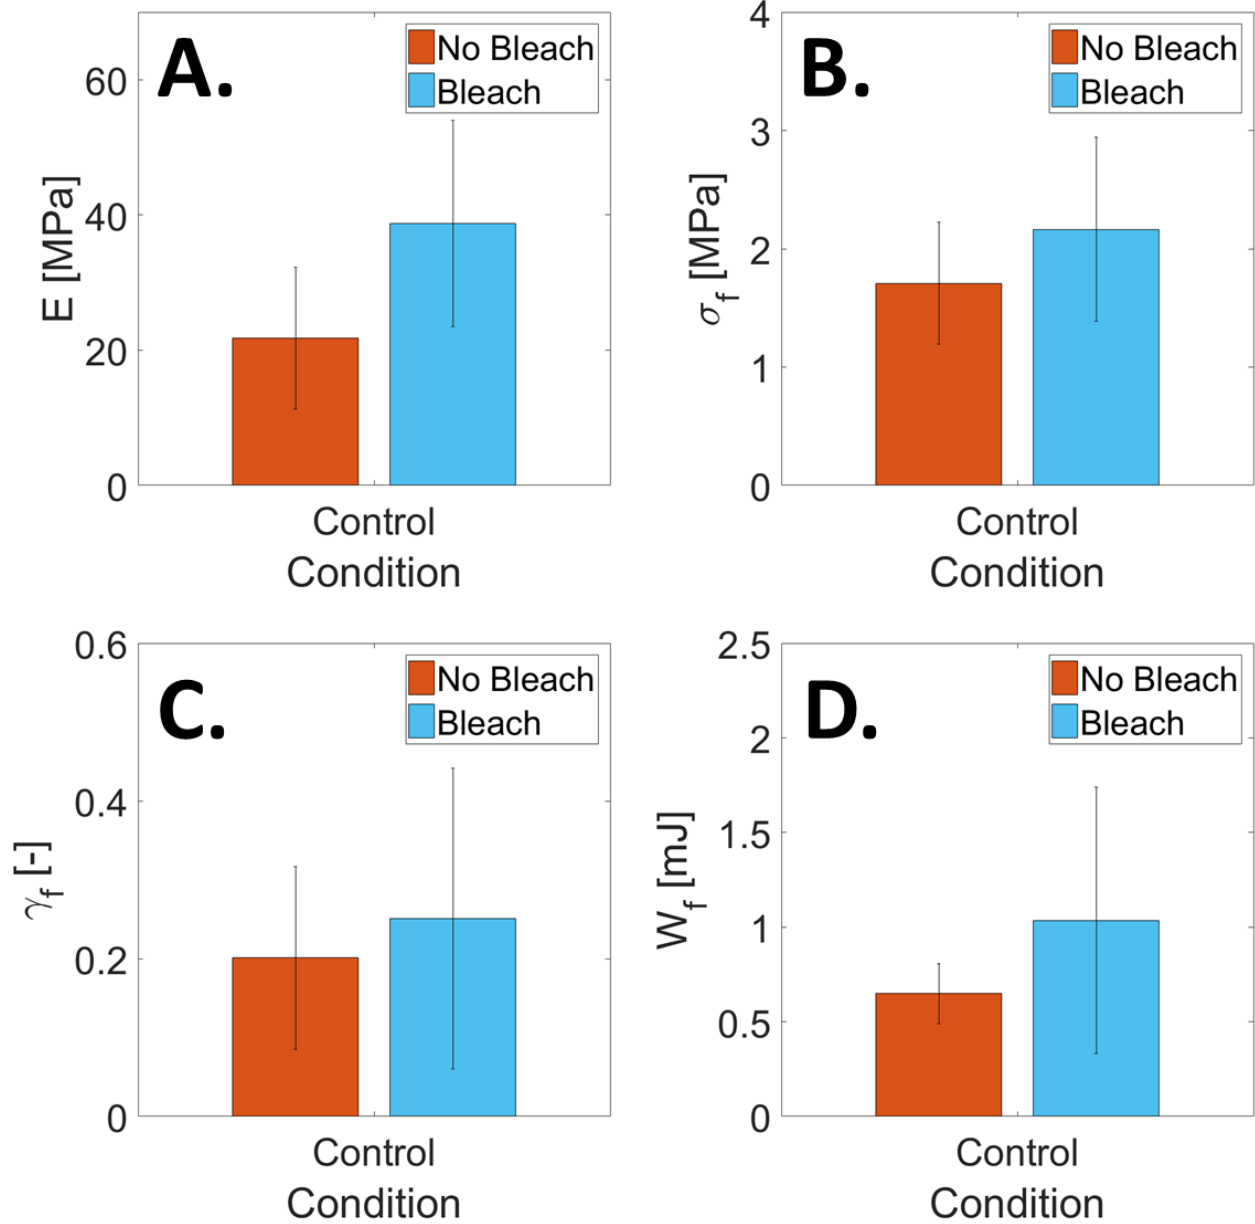

**Supplemental Figure 3. Bleach at 2.5 ml/L does not affect the mechanical properties of SC.** Average (A) elastic modulus,  $E$ , (B) fracture stress,  $\sigma_f$ , (C) fracture strain,  $\gamma_f$ , and (D) work of fracture,  $W_f$  for control samples (*orange bars*) and samples incubated in bleach for 30 mins (*blue bars*). Bars denote average values of  $4 \leq n \leq 9$  individual sample measurements for each exposure condition. Error bars denote standard deviations.
